# Supplementary material for: Concise synthesis of an enantiopure bicyclic pyrazinone as constrained peptidomimetic building block
Source: Royal Society of Chemistry journal article supplement (doi:10.1039/c2ob06762e), 2012-01-01

## Supporting information for:

### Concise Synthesis of an Enantiopure Bicyclic Pyrazinone as Constrained Peptidomimetic Building Block

Vincent Gembus,<sup>a</sup> Solenn Janvier,<sup>b</sup> Jean-Pierre Lecouvé,<sup>b</sup> Lucile Vaysse-Ludot,<sup>b</sup> Jean-François Brière<sup>a</sup> and Vincent Levacher<sup>a</sup>

<sup>a</sup> CNRS UMR COBRA, INSA et Université de Rouen, FR 3038, IRCOF (Research Institute in Fine Organic Chemistry), rue Tesnière, BP 08, 76131 Mont Saint Aignan, France.

<sup>b</sup> Oril Industries, 13 rue Auguste Desgenétais, 76210 Bolbec, France.

---

|                                                                                                                                                                                   |    |
|-----------------------------------------------------------------------------------------------------------------------------------------------------------------------------------|----|
| I NMR spectra .....                                                                                                                                                               | S2 |
| <b>I.1</b> (2 <i>S</i> ,5 <i>R</i> )-6-(((9 <i>H</i> -fluoren-9-yl)methoxy)carbonylamino)-2-amino-5-hydroxyhexanoic acid <b>4</b> ( <sup>1</sup> H) .....                         | S2 |
| <b>I.1</b> (2 <i>S</i> , 5 <i>R</i> )-6-(((9 <i>H</i> -fluoren-9-yl)methoxy)carbonylamino)-2-amino-5-hydroxyhexanoic acid <b>4</b> (JMOD) .....                                   | S2 |
| <b>I.2</b> (2 <i>S</i> , 5 <i>R</i> )-methyl 6-(((9 <i>H</i> -fluoren-9-yl)methoxy)carbonylamino)-2-amino-5-hydroxyhexanoate hydrochloride <b>5</b> ( <sup>1</sup> H) .....       | S3 |
| <b>I.2</b> (2 <i>S</i> , 5 <i>R</i> )-methyl 6-(((9 <i>H</i> -fluoren-9-yl)methoxy)carbonylamino)-2-amino-5-hydroxyhexanoate hydrochloride <b>5</b> (JMOD) .....                  | S3 |
| <b>I.3</b> (2 <i>S</i> ,5 <i>R</i> )-methyl 6-(((9 <i>H</i> -fluoren-9-yl)methoxy)carbonylamino)-5-hydroxy-2-(2-methoxy-2-oxoacetamido)hexanoate <b>7</b> ( <sup>1</sup> H) ..... | S4 |
| <b>I.3</b> (2 <i>S</i> ,5 <i>R</i> )-methyl 6-(((9 <i>H</i> -fluoren-9-yl)methoxy)carbonylamino)-5-hydroxy-2-(2-methoxy-2-oxoacetamido)hexanoate <b>7</b> (JMOD) .....            | S4 |
| <b>I.4</b> ( <i>S</i> )-methyl 6-(((9 <i>H</i> -fluoren-9-yl)methoxy)carbonylamino)-2-(2-methoxy-2-oxoacetamido)-5-oxohexanoate <b>3</b> ( <sup>1</sup> H) .....                  | S5 |
| <b>I.4</b> ( <i>S</i> )-methyl 6-(((9 <i>H</i> -fluoren-9-yl)methoxy)carbonylamino)-2-(2-methoxy-2-oxoacetamido)-5-oxohexanoate <b>3</b> (JMOD) .....                             | S5 |
| <b>I.5</b> ( <i>S</i> )-methyl 8 <i>a</i> -hydroxy-3,4-dioxooctahydropyrrolo[1,2- <i>a</i> ]pyrazine-6-carboxylate <b>2</b> ( <sup>1</sup> H) .....                               | S6 |
| <b>I.5</b> ( <i>S</i> )-methyl 8 <i>a</i> -hydroxy-3,4-dioxooctahydropyrrolo[1,2- <i>a</i> ]pyrazine-6-carboxylate <b>2</b> (JMOD) .....                                          | S6 |
| <b>I.6</b> ( <i>S</i> )-Methyl 3,4-dioxo-2,3,4,6,7,8-hexahydropyrrolo[1,2- <i>a</i> ]pyrazine-6-carboxylate <b>1</b> ( <sup>1</sup> H) .....                                      | S7 |
| <b>I.6</b> ( <i>S</i> )-Methyl 3,4-dioxo-2,3,4,6,7,8-hexahydropyrrolo[1,2- <i>a</i> ]pyrazine-6-carboxylate <b>1</b> (JMOD) .....                                                 | S7 |

## I NMR spectra

### I.1 (2*S*,5*R*)-6-(((9*H*-fluoren-9-yl)methoxy)carbonylamino)-2-amino-5-hydroxyhexanoic acid 4 (<sup>1</sup>H)

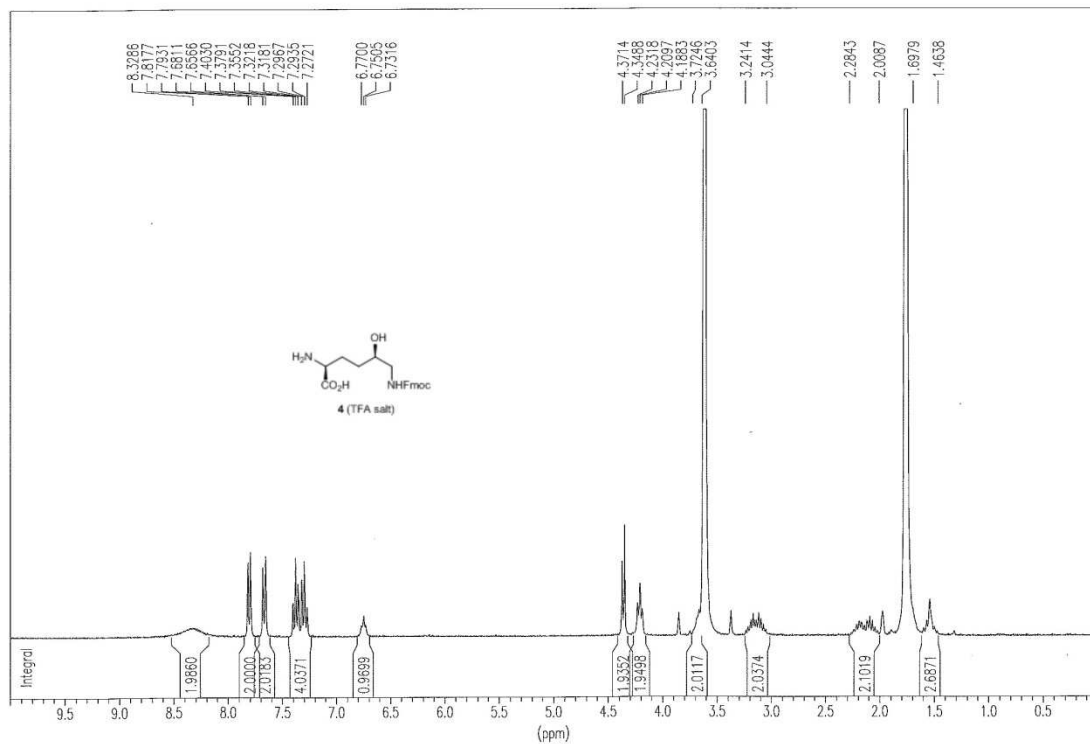

### I.1 (2*S*, 5*R*)-6-(((9*H*-fluoren-9-yl)methoxy)carbonylamino)-2-amino-5-hydroxyhexanoic acid 4 (JMOD)

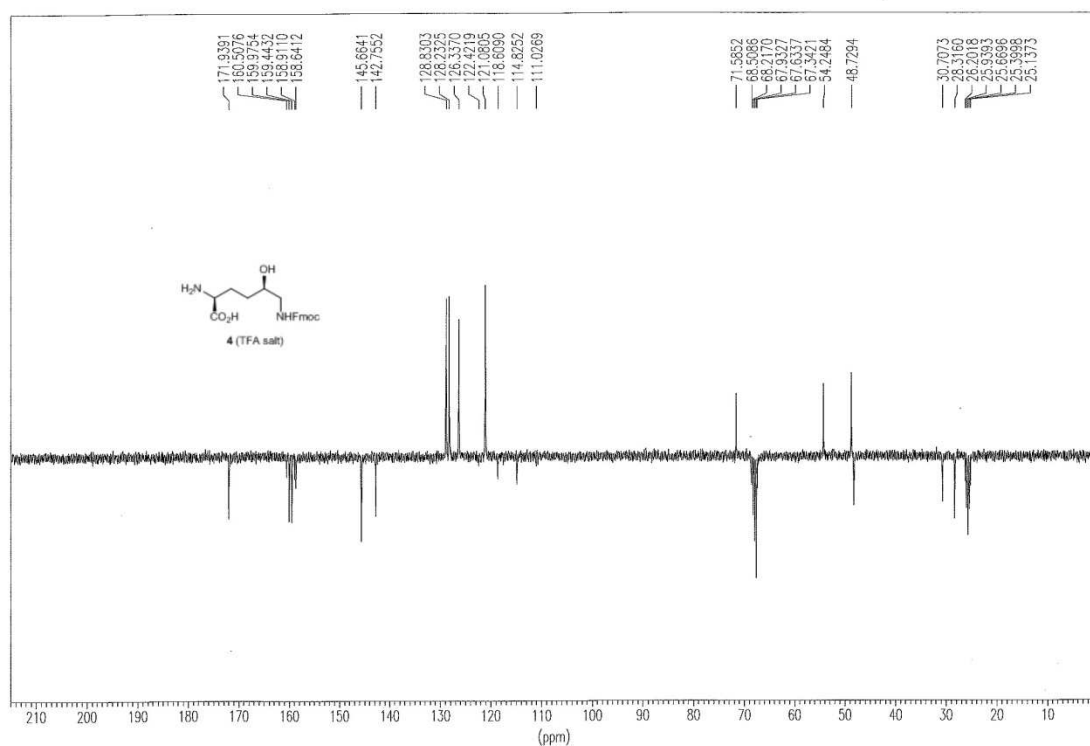

**I.2** (2*S*, 5*R*)-methyl 6-(((9*H*-fluoren-9-yl)methoxy)carbonylamino)-2-amino-5-hydroxyhexanoate hydrochloride **5** (<sup>1</sup>H)

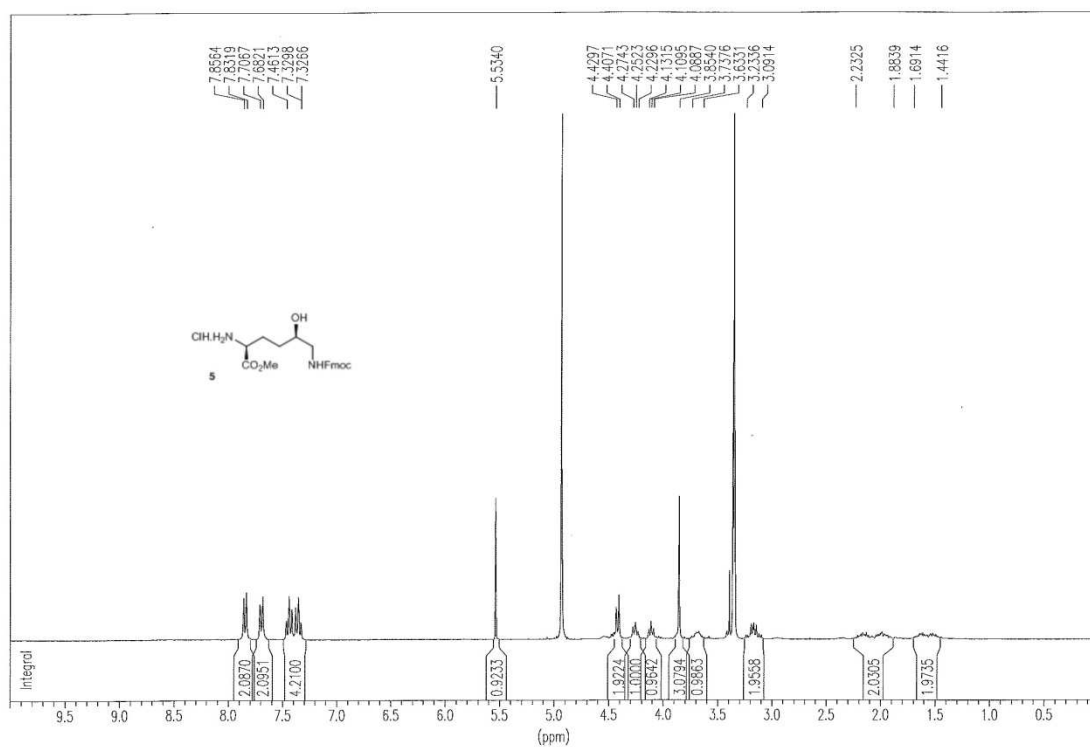

**I.2** (2*S*, 5*R*)-methyl 6-(((9*H*-fluoren-9-yl)methoxy)carbonylamino)-2-amino-5-hydroxyhexanoate hydrochloride **5** (JMOD)

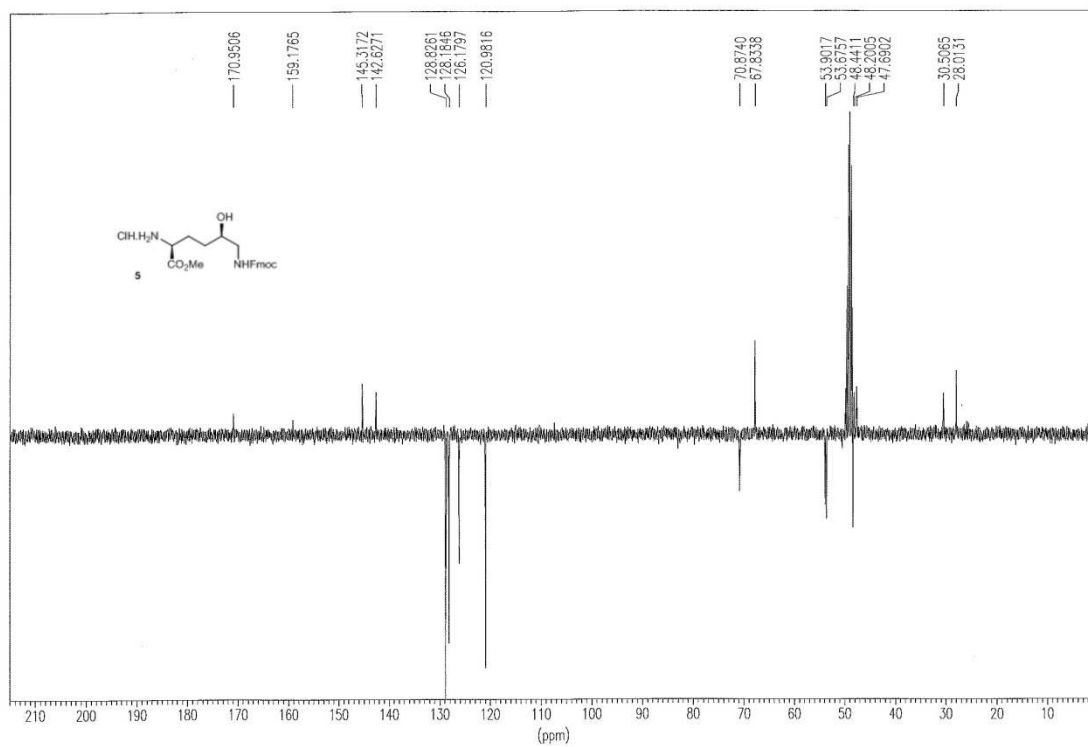

**I.3** (2*S*,5*R*)-methyl 6-(((9*H*-fluoren-9-yl)methoxy)carbonylamino)-5-hydroxy-2-(2-methoxy-2-oxoacetamido)hexanoate **7** (<sup>1</sup>H)

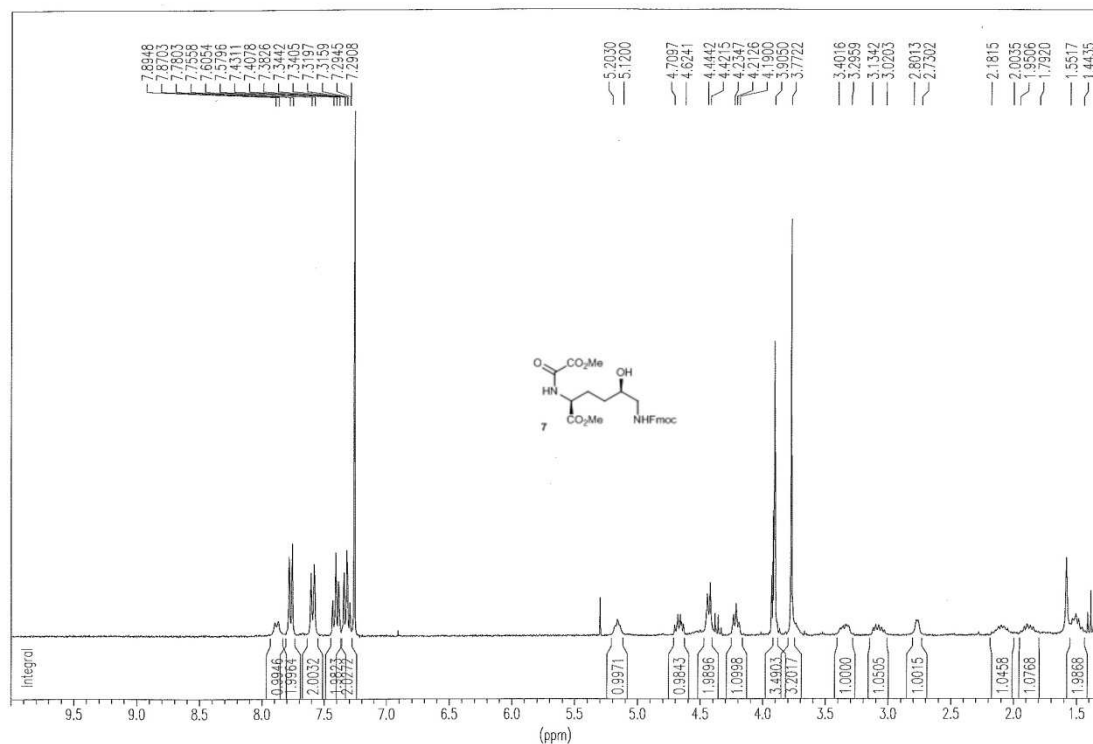

**II.3** (2*S*,5*R*)-methyl 6-(((9*H*-fluoren-9-yl)methoxy)carbonylamino)-5-hydroxy-2-(2-methoxy-2-oxoacetamido)hexanoate **7** (JMOD)

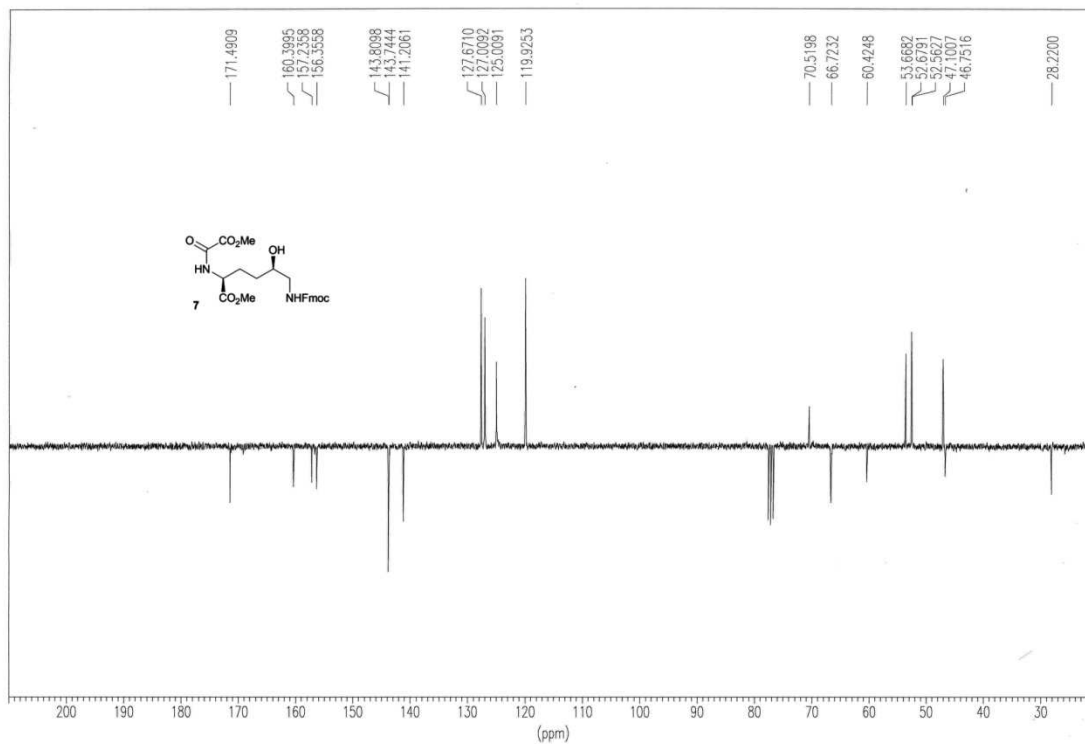

**II.4** (*S*)-methyl 6-(((9H-fluoren-9-yl)methoxy)carbonylamino)-2-(2-methoxy-2-oxoacetamido)-5-oxohexanoate **3** ( $^1\text{H}$ )

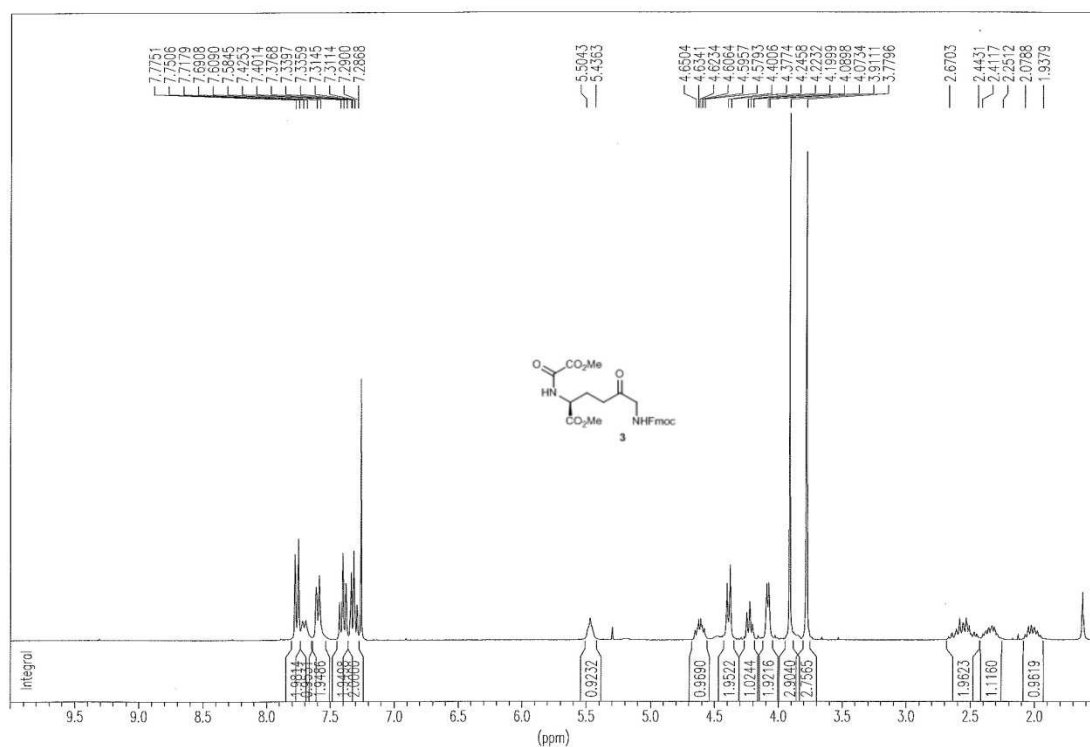

**II.4** (*S*)-methyl 6-(((9H-fluoren-9-yl)methoxy)carbonylamino)-2-(2-methoxy-2-oxoacetamido)-5-oxohexanoate **3** (JMOL)

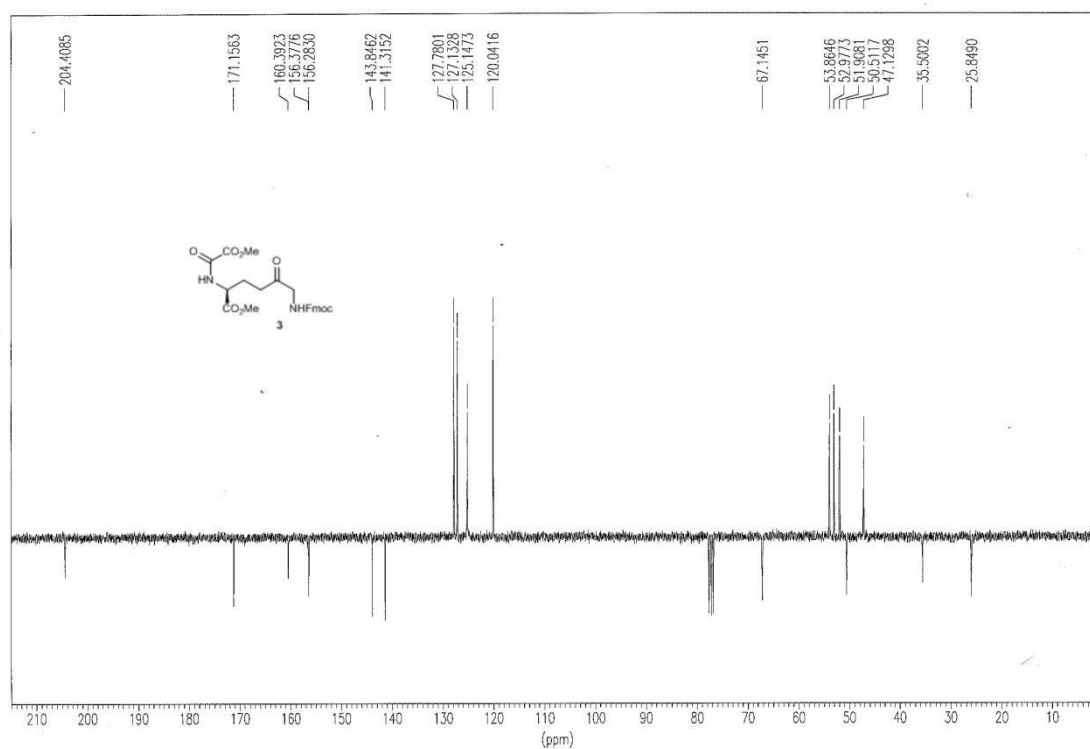

**II.5** (*S*)-methyl 8a-hydroxy-3,4-dioxooctahydropyrrolo[1,2-*a*]pyrazine-6-carboxylate **2** (1H)

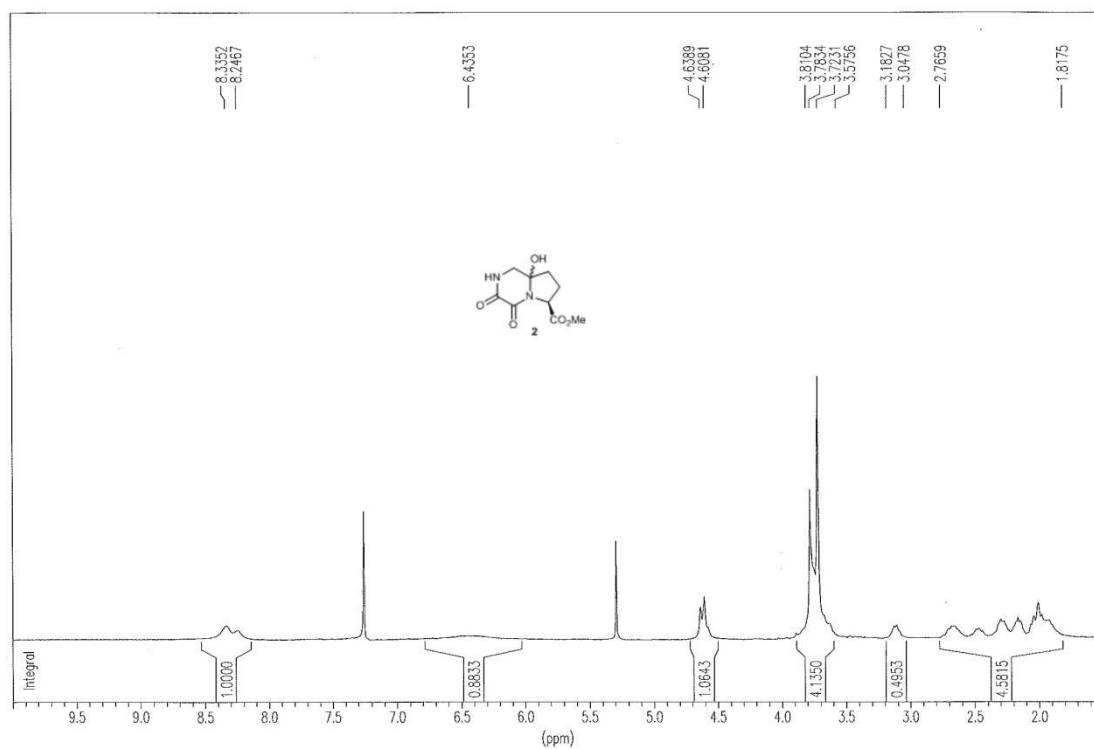

**II.5** (*S*)-methyl 8a-hydroxy-3,4-dioxooctahydropyrrolo[1,2-*a*]pyrazine-6-carboxylate **2** (JMOD)

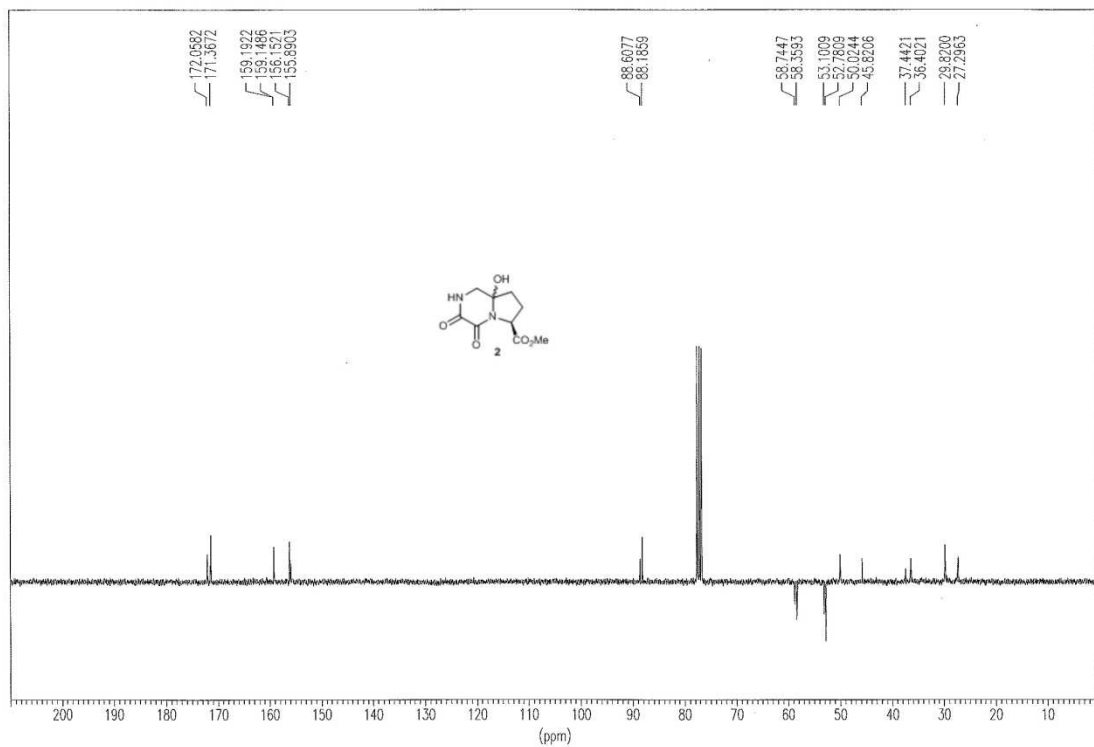

**II.6** (*S*)-Methyl 3,4-dioxo-2,3,4,6,7,8-hexahydropyrrolo[1,2-*a*]pyrazine-6-carboxylate **1** (1H)

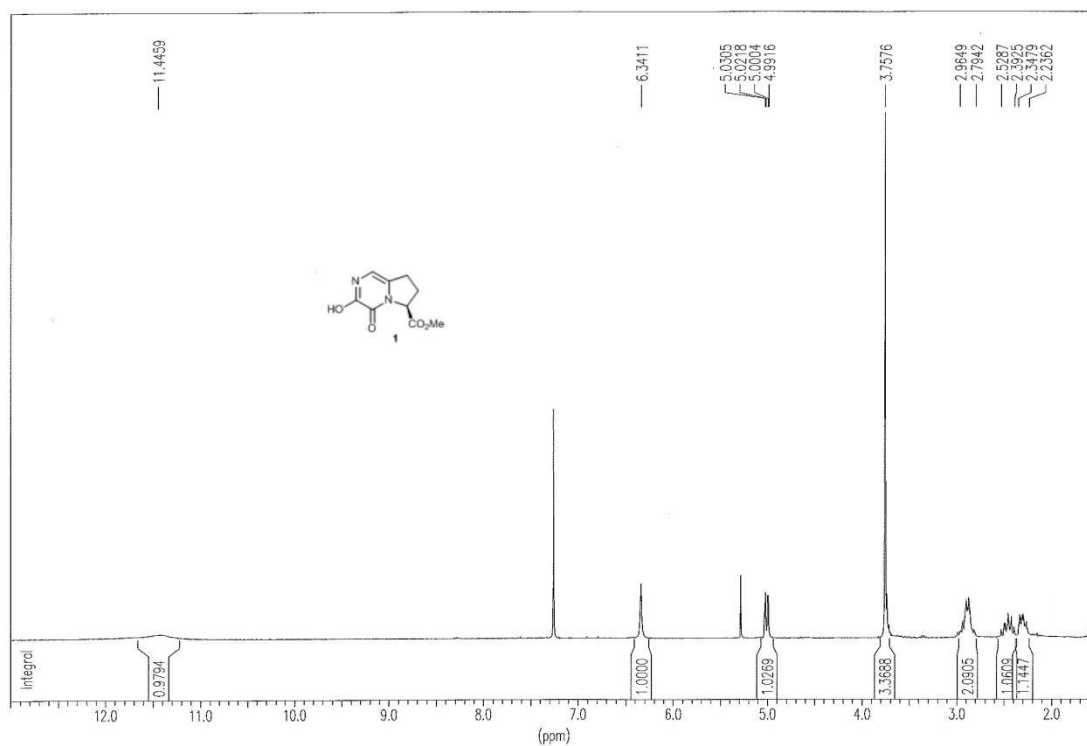

**II.6** (*S*)-Methyl 3,4-dioxo-2,3,4,6,7,8-hexahydropyrrolo[1,2-*a*]pyrazine-6-carboxylate **1** (JMOD)

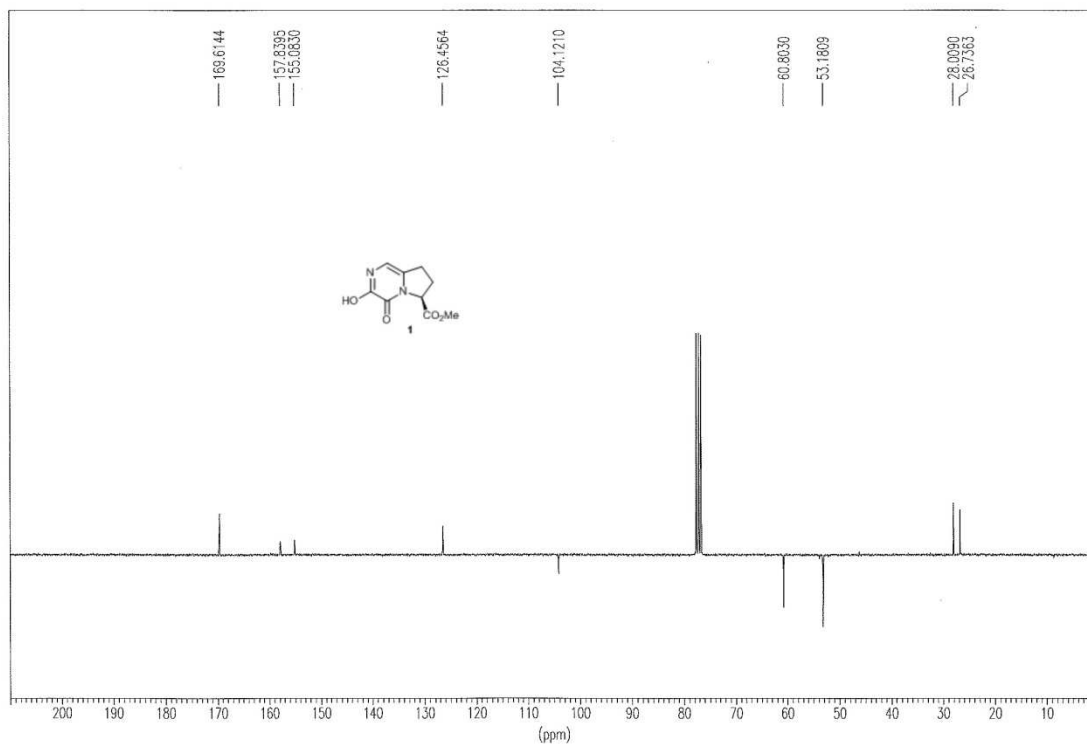

Supplement: c2ob06762e.pdf [file c2ob06762e.pdf]
